# Supplementary material for: Multiple deprotonation of primary aromatic diamines by LiAlH4
Source: Royal Society of Chemistry journal article supplement (doi:10.1039/c4dt03802a), 2015-01-01
Supplement: c4dt03802a1.pdf [file c4dt03802a1.pdf]

## Electronic Supporting Information

### Multiple Deprotonation of Primary Aromatic Diamines by $\text{LiAlH}_4$

Robert J. Less,\* Lucy. K. Allen, Alexander Steiner and Dominic S. Wright

General Experimental Details of NMR Spectroscopic Studies

NMR spectra were obtained in  $d_8$ -THF which had been dried over a sodium mirror. A Bruker 500 MHz TCI Cryoprobe Spectrometer were used and all spectra were recorded at 298K.

#### 1. NMR Spectra

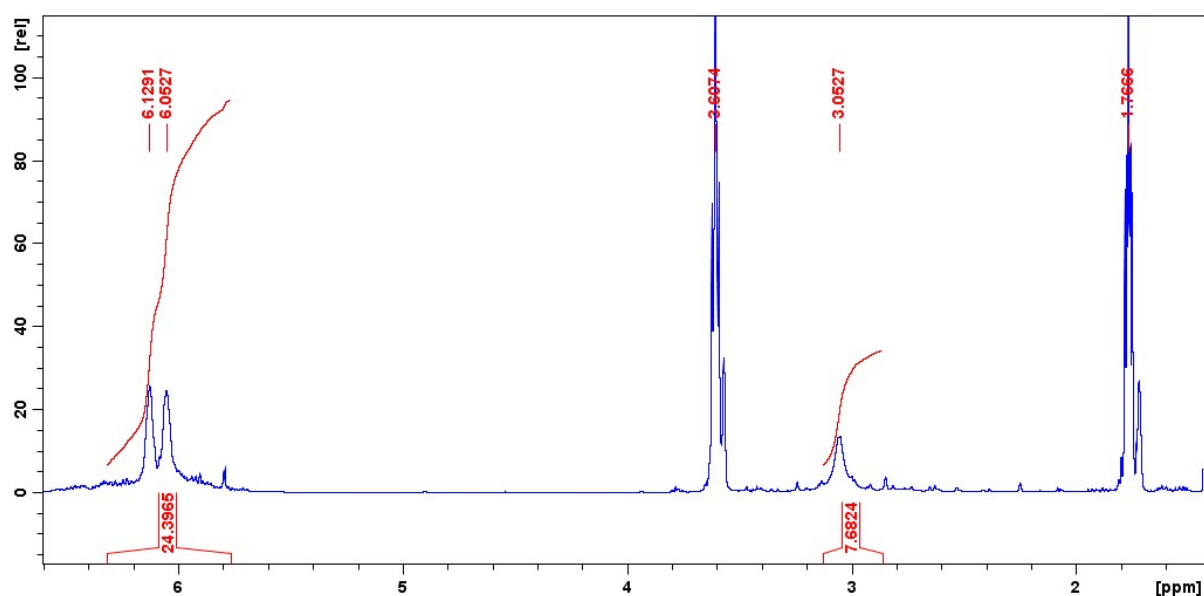

Figure 1.1  $^1\text{H}$  NMR Spectrum of  $[\{\text{Al}(\mathbf{1H}_2)\}_2\{\text{Al}(\mathbf{1H})_2\}_2][\text{Li}(\text{THF})_2]_4$  (**3**) in  $d_8$ -THF

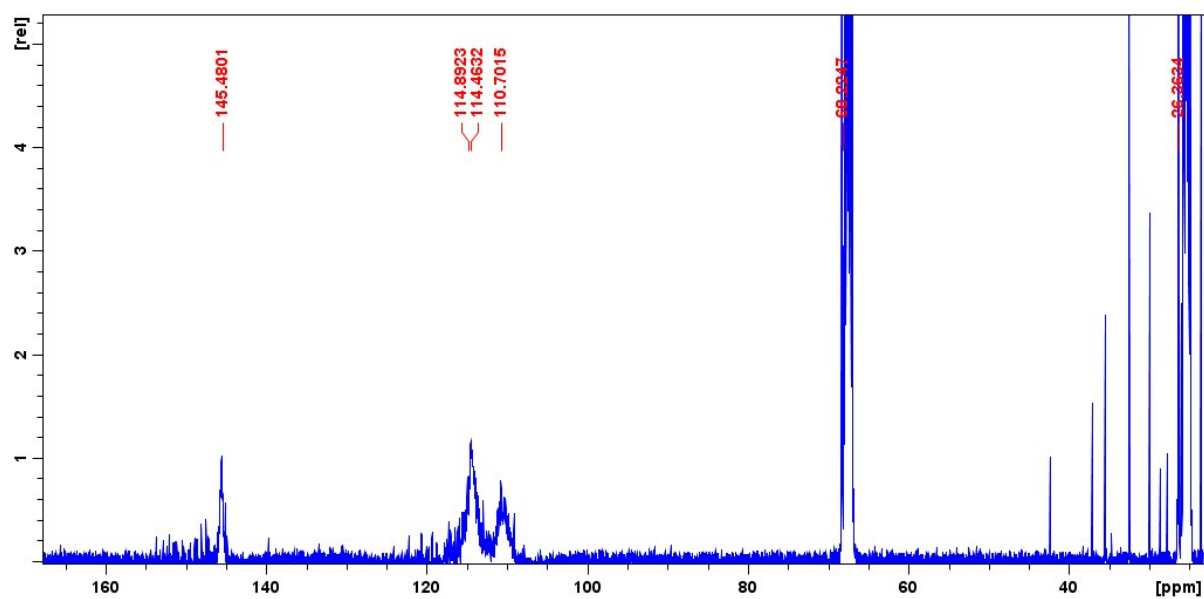

**Figure 1.2**  $^{13}\text{C}$  NMR Spectrum of  $[\{\text{Al}(\mathbf{1H}_2)\}_2\{\text{Al}(\mathbf{1H})_2\}_2][\text{Li}(\text{THF})_2]_4$  (**3**) in  $d_8$ -THF

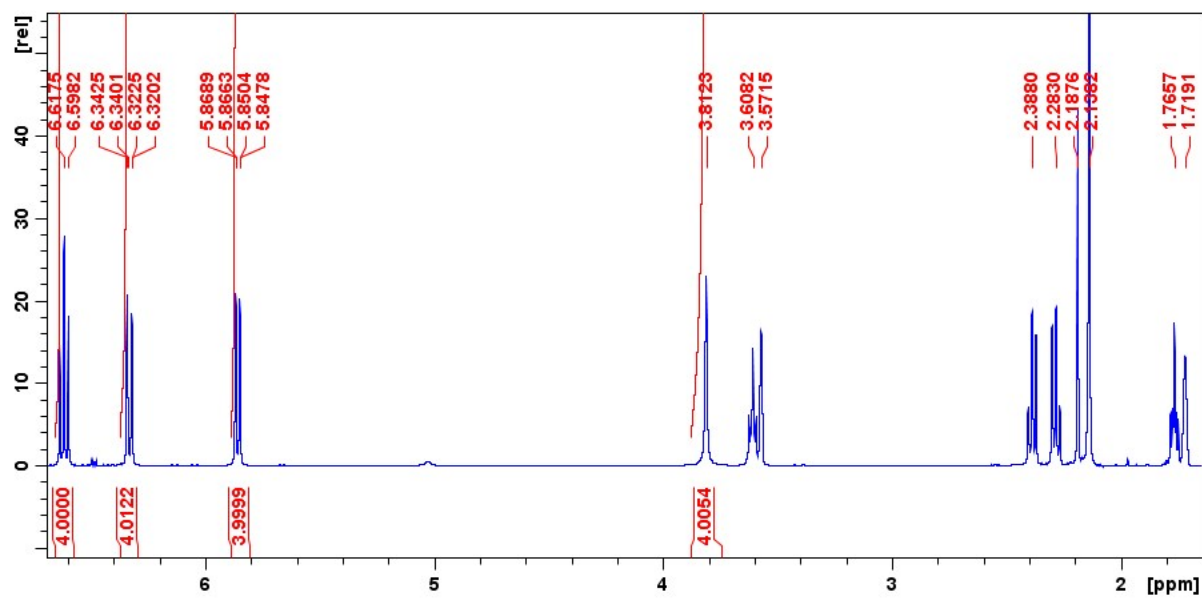

**Figure 1.3**  $^1\text{H}$  NMR Spectrum of  $[\text{Al}(\mathbf{2H}_2)_2][\text{Li}(\text{PMDETA})(\text{THF})]^+$  (**4**): in  $d_8$ -THF

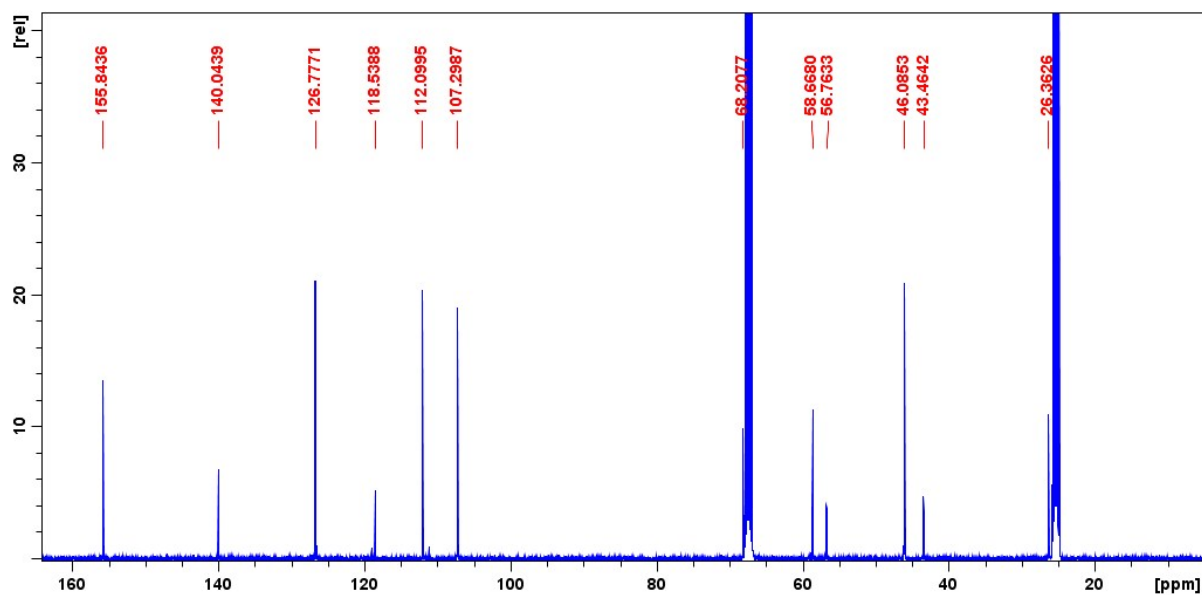

**Figure 1.4**  $^{13}\text{C}$  NMR Spectrum of  $[\text{Al}(\mathbf{2H}_2)_2][\text{Li}(\text{PMDETA})(\text{THF})]^+$  (**4**): in  $d_8$ -THF

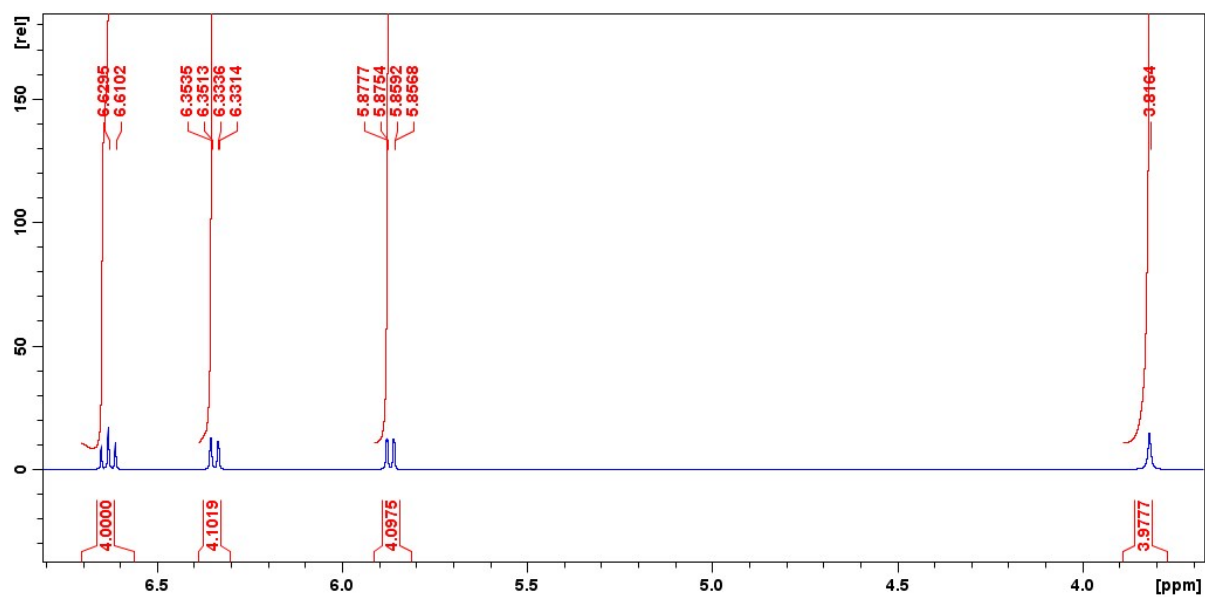

Figure 1.5  $^1\text{H}$  NMR Spectrum of  $[\text{Al}(\text{2H}_2)_2]^-[\text{Li}(\text{TMEDA})_{1.5}(\text{THF})_{0.5}]^+$  (5): in  $\text{d}_8\text{-THF}$

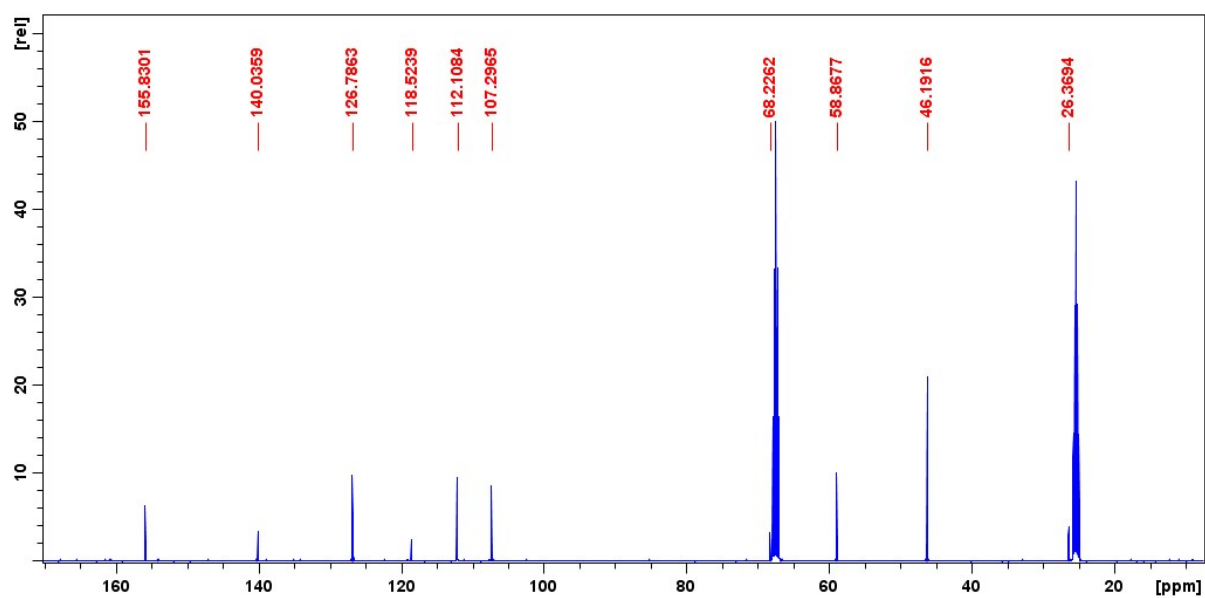

Figure 1.6  $^{13}\text{C}$  NMR Spectrum of  $[\text{Al}(\text{2H}_2)_2]^-[\text{Li}(\text{TMEDA})_{1.5}(\text{THF})_{0.5}]^+$  (5): in  $\text{d}_8\text{-THF}$
